# Supplementary material
Source: publisher site journal article supplement (https://www.degruyterbrill.com/publication/journal_key/FABL/downloadAsset/FABL_Gestaltungsrichtlinien,%20deutsch--de.pdf)
Supplement: Supplementary file 1 [file FABL_Gestaltungsrichtlinien,%20deutsch--de.pdf]

# FABULA

Zeitschrift für Erzählforschung – Journal of Folktale Studies – Revue d'Etudes sur le Conte Populaire

## Gestaltungsrichtlinien für FABULA-Manuskripte

FABULA veröffentlicht Beiträge zur Erzählforschung in den Sprachen Deutsch, Englisch und Französisch. Die durchschnittliche Länge von FABULA-Aufsätzen beträgt 16 Druckseiten. Bitte fügen Sie Ihrem Manuskript am Ende ein Abstract von 50–80 Wörtern in englischer, französischer und deutscher Sprache bei. Hinweis für Manuskripte in deutscher Sprache: FABULA verwendet nicht die neue deutsche Orthographie.

Bitte senden Sie Ihren Beitrag als Manuskript und in elektronischer Form an die unten angegebene Adresse des Herausgebers. Als Dateiformate können neben dem Rich Text Format (rtf) WINDOWS Microsoft Word ab 6.0 und WordPerfect ab 5.2 verwendet werden. Die Texte sollen als Fließtext verfaßt sein, d. h. keine Layout-Gestaltung, Silbentrennung oder sonstigen Formatierungen enthalten.

Quellenzitate oder Originaltexte werden in doppelte Anführungszeichen gesetzt. In einfachen Anführungszeichen erscheinen: Übersetzungen von Originalzitaten; Zitate oder wörtliche Reden innerhalb von Zitaten. Einfache Anführungszeichen werden außerdem zur Heraushebung einzelner Wörter oder Begriffe verwendet. Auslassungen innerhalb von Zitaten werden durch drei Punkte in einer eckigen Klammer gekennzeichnet.

Im Text zitierte Titel von Büchern, Artikeln, Periodika, Einzel- und Sammelwerken etc. sowie die Lemmata von AaTh-Typen und Erzählmotiven werden kursiv gesetzt.

Beispiele:

Die *Kinder- und Hausmärchen* der Brüder Grimm  
Charles Perraults *Cendrillon*  
Axel Olriks Aufsatz *Epische Grundgesetze der Volksdichtung*  
Bürgers Ballade *Lenore*  
AaTh 303: *The Twins or Blood-Brothers*  
Mot. D 1664: *Summer and winter garden*

Die Hervorhebung von Wörtern erfolgt durch Sperren.

## Zitierv Verfahren

Es können zwei verschiedene Zitierv Verfahren benutzt werden.

### 1. Quellen- bzw. Literaturangaben direkt im Text:

Beispiel für eine Literaturangabe: Platon erzählt mit seiner Gyges-Sage unwissentlich zweimal dieselbe Geschichte (Aly 1921, 311).  
Beispiel für ein Zitat: "Mord – das ist, im Denken der Literatur, der fundamentale Konflikt mit der vorhandenen Ordnung" (Matt 1966, 27).

Bei diesem Verfahren muß am Ende des Beitrages ein alphabetisches Verzeichnis der zitierten Quellen und Literatur beigelegt werden. Dabei wird folgende Zitierform verwendet:

Aly, Wolfgang: *Volksmärchen, Sage und Novelle bei Herodot und seinen Zeitgenossen*. Göttingen 1969.  
Matt, Peter von: *Liebesverrat. Die Treulosen in der Literatur*. München <sup>3</sup>1996.

### 2. Quellen- und Literaturangaben als Fußnoten:

Zitierv Verfahren für Bücher:

Aarne, Antti/Thompson, Stith: *The Types of the Folktale. A Classification and Bibliography. Second Revision* (FF Communications 184). Helsinki (1961) <sup>3</sup>1973.  
Hervieux, Léopold: *Les Fabulistes latins. Depuis le siècle d'Auguste jusqu'à la fin du moyen âge* 1–2. Paris (1884) <sup>2</sup>1893–94; Bd. 3–5. Paris 1894–99, hier Bd. 1, 475–495.  
Brückner, W. (Hg.): *Volkserzählung und Reformation. Ein Handbuch zur Tradierung und Funktion von Erzählstoffen und Erzählliteratur im Protestantismus*. Berlin 1974.

Zitierv Verfahren für Beiträge in Sammelwerken:

Bausinger, Hermann: *Märchen*. In: *Enzyklopädie des Märchens* 9. Hg. Rolf Wilhelm Brednich u. a. Berlin/New York 1999, 250–274, hier 264 f.

Zitierv Verfahren für Zeitschriftenaufsätze:

Schenda, Rudolf: Giambattista Basile, Neapel und die mediterranen Erzähltraditionen. Ein Meer ohne Märchenhaftigkeit. In: *Fabula* 40 (1999) 33–49,

hier 42.

Für nichtselbständige Publikationen sind immer vollständige Seitenzahlen anzugeben:

Thompson, Stith: The Star Husband Tale. In: The Study of Folklore. Hg. Alan Dundes. Englewood Cliffs, N.J. 1965, 414–474, hier 414–418.

Auf bereits genannte Titel wird folgendermaßen Bezug genommen:

vgl. Tenèze (wie Anm. 5) 793.

Für Titel aus nichtgermanischen und nichtromanischen Sprachen bitten wir eine Übersetzung anzugeben. Umschriften aus nichtlateinischen Schriftsystemen ins Deutsche folgen den heute wissenschaftlich gebräuchlichen Transkriptionssystemen (vgl. Schürfeld, C.: Kurzgefaßte Regeln für die alphabetische Katalogisierung an Institutsbibliotheken. Bonn <sup>4</sup>1970).

Beispiel:

Narodnye russkie skazki A. N. Afanas'eva (A. N. Afanas'evs Russische Volksmärchen) 1–3. Hg. V. Ja. Propp. Moskau 1957.

Bitte beachten Sie, daß in den Anmerkungen und Literaturnachweisen keine Kursivsetzungen verwendet und keine Abkürzungen für Titel von Büchern, Zeitschriften etc. gebraucht werden. Im Deutschen können folgende übliche Abkürzungen verwendet werden:

Abb. = Abbildung  
Anm. = Anmerkung  
Bd. = Band  
ebd. = ebenda  
f. = der/die folgende  
ff. = die folgenden  
ders. = derselbe  
dies. = dieselbe, dieselben  
hg. = herausgegeben von  
Hg. = Herausgeber, Herausgeberin  
Nr. = Nummer  
o.J. = ohne Jahr  
o.O. = ohne Ort  
s. = siehe  
S. = Seite  
Sp. = Spalte  
u.a. = und andere  
vgl. = vergleiche

Herausgeber des Aufsatzteils:  
Prof. Dr. Rolf Wilhelm Brednich  
Seminar für Volkskunde  
Friedländer Weg 2  
37085 Göttingen  
e-mail: [rbredni@gwdg.de](mailto:rbredni@gwdg.de)

Redaktion des Aufsatzteils:  
Christine Shojaei Kawan  
Enzyklopädie des Märchens  
Friedländer Weg 2  
37085 Göttingen  
e-mail: [ckawan@gwdg.de](mailto:ckawan@gwdg.de)

Herausgeber des Rezensionsteils:  
Prof. Dr. Ulrich Marzolph  
Enzyklopädie des Märchens  
Friedländer Weg 2  
37085 Göttingen  
e-mail: [umarzol@gwdg.de](mailto:umarzol@gwdg.de)
